# Supplementary material for: Comparing the Appetitive Learning Performance of Six European Honeybee Subspecies in a Common Apiary
Source: MDPI journal article supplement (doi:10.3390/insects12090768), 2021-08-27
Supplement: s1 [file s1]

## Supplementary Materials:

**Table S1.** Number of bees in each GRS class of each subspecies.

| GRS Class | <i>carnica</i> | <i>iberiensis</i> | <i>mellifera</i> | <i>ruttneri</i> | <i>macedonica</i> | <i>ligustica</i> | Total |
|-----------|----------------|-------------------|------------------|-----------------|-------------------|------------------|-------|
| 1         | 3              | 5                 | 5                | 2               | 4                 | 0                | 19    |
| 2         | 4              | 5                 | 7                | 2               | 3                 | 2                | 23    |
| 3         | 6              | 6                 | 3                | 6               | 1                 | 0                | 22    |
| 4         | 3              | 0                 | 2                | 4               | 0                 | 0                | 9     |
| 5         | 2              | 4                 | 3                | 6               | 3                 | 1                | 19    |
| 6         | 8              | 4                 | 14               | 3               | 4                 | 5                | 38    |
| 7         | 60             | 32                | 37               | 51              | 30                | 10               | 220   |
| total     | 86             | 56                | 71               | 74              | 45                | 18               | 350   |

**Table S2.** Comparison of acquisition scores. Test statistics for Kruskal Wallis H tests (KW) and *p* values corrected for multiple comparisons are given.

|                   | <i>carnica</i> | <i>iberiensis</i>             | <i>mellifera</i>             | <i>ruttneri</i>               | <i>macedonica</i>            | <i>ligustica</i>             |
|-------------------|----------------|-------------------------------|------------------------------|-------------------------------|------------------------------|------------------------------|
| <i>carnica</i>    | *****          | KW = 3.74<br><i>p</i> = 0.003 | KW = 2.19<br><i>p</i> = 0.43 | KW = 0.21<br><i>p</i> = 1.00  | KW = 0.39<br><i>p</i> = 1.00 | KW = 0.24<br><i>p</i> = 1.00 |
| <i>iberiensis</i> | *****          | *****                         | KW = 1.63<br><i>p</i> = 1.00 | KW = 3.44<br><i>p</i> = 0.009 | KW = 2.86<br><i>p</i> = 0.49 | KW = 2.14<br><i>p</i> = 0.49 |
| <i>mellifera</i>  | *****          | *****                         | *****                        | KW = 1.91<br><i>p</i> = 0.85  | KW = 1.47<br><i>p</i> = 1.00 | KW = 1.09<br><i>p</i> = 1.00 |
| <i>ruttneri</i>   | *****          | *****                         | *****                        | *****                         | KW = 0.20<br><i>p</i> = 1.00 | KW = 0.11<br><i>p</i> = 1.00 |
| <i>macedonica</i> | *****          | *****                         | *****                        | *****                         | *****                        | KW = 0.03<br><i>p</i> = 1.00 |
| <i>ligustica</i>  | *****          | *****                         | *****                        | *****                         | *****                        | *****                        |

**Table S3.** Comparison of acquisition curves. Test statistics for Sidak post hoc tests are given.

|                   | <i>carnica</i> | <i>iberiensis</i> | <i>mellifera</i> | <i>ruttneri</i>  | <i>macedonica</i> | <i>ligustica</i> |
|-------------------|----------------|-------------------|------------------|------------------|-------------------|------------------|
| <i>carnica</i>    | *****          | <i>p</i> = 0.003  | <i>p</i> = 0.29  | <i>p</i> = 1.00  | <i>p</i> = 1.00   | <i>p</i> = 1.00  |
| <i>iberiensis</i> | *****          | *****             | <i>p</i> = 0.95  | <i>p</i> = 0.005 | <i>p</i> = 0.13   | <i>p</i> = 0.13  |
| <i>mellifera</i>  | *****          | *****             | *****            | <i>p</i> = 0.35  | <i>p</i> = 1.00   | <i>p</i> = 0.84  |
| <i>ruttneri</i>   | *****          | *****             | *****            | *****            | <i>p</i> = 1.00   | <i>p</i> = 1.00  |
| <i>macedonica</i> | *****          | *****             | *****            | *****            | *****             | <i>p</i> = 1.00  |
| <i>ligustica</i>  | *****          | *****             | *****            | *****            | *****             | *****            |
